# Supplementary material
Source: PubMed Central journal article supplement (PMC3997073)
Supplement: Supp_Fig5.pdf [file Supp_Fig5.pdf]

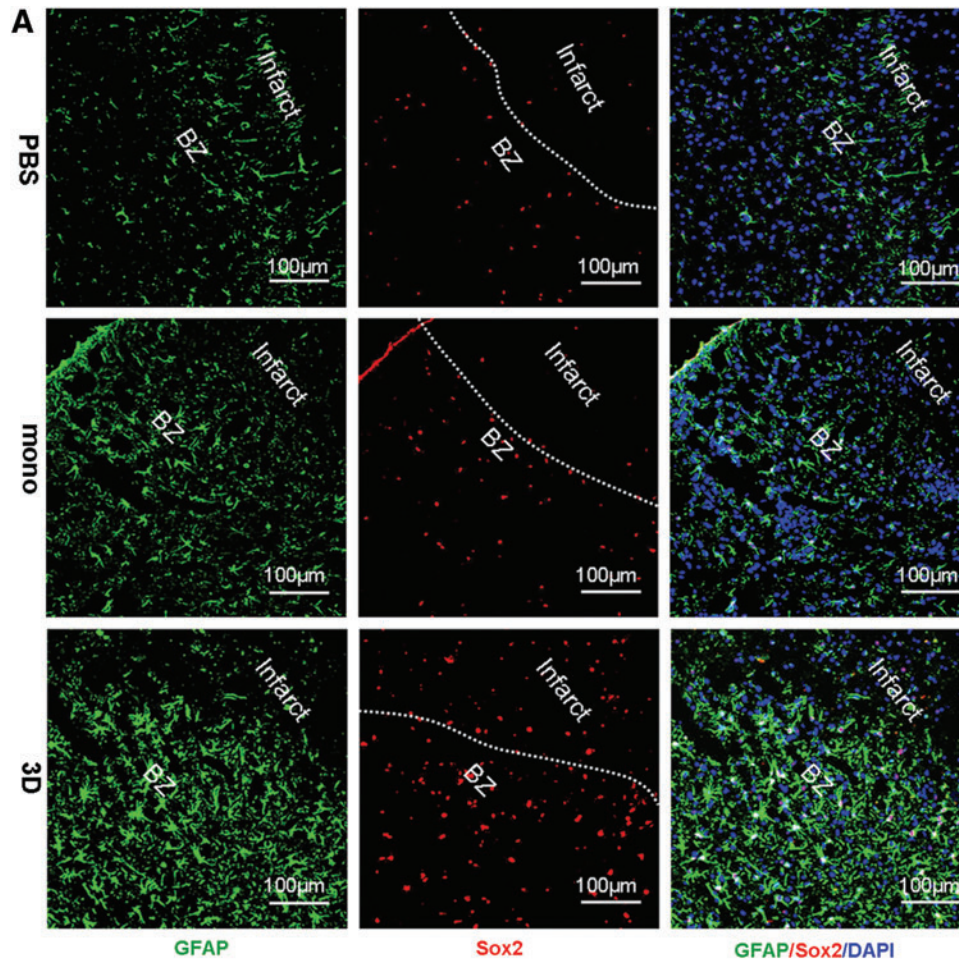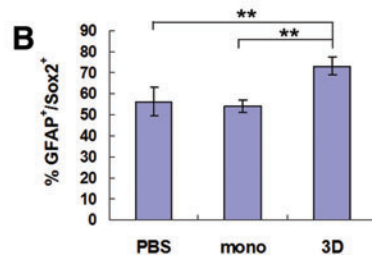

**SUPPLEMENTARY FIG. S5.** Expression of Sox2 in GFAP-expressing cells. (A, B) Rats with MCAO received intracarotid infusion of 1 million monolayer (mono) or 3D spheroid (3D) hMSCs or equal volume of vehicle PBS 24 h after MCAO. Immunofluorescence stain of coronal sections of the brain 3 days after cell transplantation showed that over 50% of GFAP-expressing cells were also positive for Sox2 (A, B), and the proportion of GFAP<sup>+</sup>/Sox2<sup>+</sup> cells in spheroid-hMSC-treated rats was higher, compared with monolayer-hMSC- or PBS-treated rats [(B),  $n=5$ ,  $**P<0.01$ ]. BZ, peri-infarct border zone.
